# Supplementary material for: Fast, efficient, narrowband room-temperature phosphorescence from metal-free 1,2-diketones: rational design and the mechanism
Source: Royal Society of Chemistry journal article supplement (doi:10.1039/d4sc02841d), 2024-01-01
Supplement: d4sc02841d2.pdf [file d4sc02841d2.pdf]

**1a** TP conformer @S<sub>0</sub>

| E(RB3LYP) | -6478.74000672 | a.u.       |           |
|-----------|----------------|------------|-----------|
| C         | -1.4867050     | 4.0486100  | 0.0000000 |
| C         | -2.6588090     | 3.3442050  | 0.0000000 |
| S         | -2.4240920     | 1.6416790  | 0.0000000 |
| C         | -0.6743790     | 1.8358540  | 0.0000000 |
| C         | -0.3617230     | 3.1916670  | 0.0000000 |
| C         | 0.2801340      | 0.7229600  | 0.0000000 |
| O         | 1.4867050      | 0.8909240  | 0.0000000 |
| C         | -0.2801340     | -0.7229600 | 0.0000000 |
| O         | -1.4867050     | -0.8909240 | 0.0000000 |
| C         | 0.6743790      | -1.8358540 | 0.0000000 |
| C         | 0.3617230      | -3.1916670 | 0.0000000 |
| C         | 1.4867050      | -4.0486100 | 0.0000000 |
| C         | 2.6588090      | -3.3442050 | 0.0000000 |
| S         | 2.4240920      | -1.6416790 | 0.0000000 |
| Br        | 1.3757560      | 3.9487050  | 0.0000000 |
| Br        | -1.3757560     | -3.9487050 | 0.0000000 |
| H         | -1.4131550     | 5.1271940  | 0.0000000 |
| H         | -3.6619530     | 3.7482400  | 0.0000000 |
| H         | 1.4131550      | -5.1271940 | 0.0000000 |
| H         | 3.6619530      | -3.7482400 | 0.0000000 |

**1a** TP conformer @S<sub>1</sub>

| E(TD-HF/TD-DFT) | -6478.65299649 | a.u.       |           |
|-----------------|----------------|------------|-----------|
| C               | -1.4937870     | 4.0111770  | 0.0000000 |
| C               | -2.6662570     | 3.3070410  | 0.0000000 |
| S               | -2.4315710     | 1.5948950  | 0.0000000 |
| C               | -0.6841760     | 1.7994670  | 0.0000000 |
| C               | -0.3694140     | 3.1564300  | 0.0000000 |
| C               | 0.2603240      | 0.7125130  | 0.0000000 |
| O               | 1.4937870      | 0.8999840  | 0.0000000 |
| C               | -0.2603240     | -0.7125130 | 0.0000000 |
| O               | -1.4937870     | -0.8999840 | 0.0000000 |
| C               | 0.6841760      | -1.7994670 | 0.0000000 |
| C               | 0.3694140      | -3.1564300 | 0.0000000 |

|    |            |            |           |
|----|------------|------------|-----------|
| C  | 1.4937870  | -4.0111770 | 0.0000000 |
| C  | 2.6662570  | -3.3070410 | 0.0000000 |
| S  | 2.4315710  | -1.5948950 | 0.0000000 |
| Br | 1.3887780  | 3.8633960  | 0.0000000 |
| Br | -1.3887780 | -3.8633960 | 0.0000000 |
| H  | -1.4254600 | 5.0905270  | 0.0000000 |
| H  | -3.6721690 | 3.7023270  | 0.0000000 |
| H  | 1.4254600  | -5.0905270 | 0.0000000 |
| H  | 3.6721690  | -3.7023270 | 0.0000000 |

**1a** TP conformer @T<sub>1</sub>

|           |                |            |           |
|-----------|----------------|------------|-----------|
| E(UB3LYP) | -6478.66597736 | a.u.       |           |
| C         | -1.4914120     | 4.0194440  | 0.0000000 |
| C         | -2.6642750     | 3.3185310  | 0.0000000 |
| S         | -2.4312750     | 1.6064920  | 0.0000000 |
| C         | -0.6837560     | 1.8076410  | 0.0000000 |
| C         | -0.3669200     | 3.1617700  | 0.0000000 |
| C         | 0.2568680      | 0.7115080  | 0.0000000 |
| O         | 1.4914120      | 0.8910470  | 0.0000000 |
| C         | -0.2568680     | -0.7115080 | 0.0000000 |
| O         | -1.4914120     | -0.8910470 | 0.0000000 |
| C         | 0.6837560      | -1.8076410 | 0.0000000 |
| C         | 0.3669200      | -3.1617700 | 0.0000000 |
| C         | 1.4914120      | -4.0194440 | 0.0000000 |
| C         | 2.6642750      | -3.3185310 | 0.0000000 |
| S         | 2.4312750      | -1.6064920 | 0.0000000 |
| Br        | 1.3894040      | 3.8763550  | 0.0000000 |
| Br        | -1.3894040     | -3.8763550 | 0.0000000 |
| H         | -1.4196000     | 5.0985110  | 0.0000000 |
| H         | -3.6698260     | 3.7146850  | 0.0000000 |
| H         | 1.4196000      | -5.0985110 | 0.0000000 |
| H         | 3.6698260      | -3.7146850 | 0.0000000 |

**1b** TP conformer @S<sub>1</sub>

|                 |                |           |           |
|-----------------|----------------|-----------|-----------|
| E(TD-HF/TD-DFT) | -7768.01227585 | a.u.      |           |
| S               | -2.8369220     | 0.0587510 | 0.6384550 |

|    |            |            |            |
|----|------------|------------|------------|
| C  | -4.2670030 | 0.0005680  | -0.3554360 |
| C  | -3.9262380 | -0.0857220 | -1.6892360 |
| H  | -4.6473350 | -0.1370260 | -2.4949580 |
| C  | -2.5354460 | -0.1066360 | -1.9147610 |
| C  | -1.7690010 | -0.0352360 | -0.7528830 |
| C  | -0.3308700 | -0.0411850 | -0.6818740 |
| O  | 0.3897710  | -0.1112200 | -1.6971290 |
| Br | -1.8357270 | -0.2287970 | -3.6753770 |
| Si | -5.9999210 | 0.1341160  | 0.3882560  |
| C  | -5.9278510 | -0.6426300 | 2.1276910  |
| H  | -5.0967400 | -0.1112640 | 2.6147920  |
| C  | -5.5741780 | -2.1401080 | 2.1409350  |
| H  | -5.3666180 | -2.4777530 | 3.1621690  |
| H  | -4.6924270 | -2.3666520 | 1.5365240  |
| H  | -6.3999730 | -2.7491140 | 1.7642450  |
| C  | -7.1892610 | -0.3722880 | 2.9678720  |
| H  | -8.0640340 | -0.8856220 | 2.5579330  |
| H  | -7.4318390 | 0.6918910  | 3.0308770  |
| H  | -7.0563670 | -0.7368880 | 3.9923450  |
| C  | -6.4250630 | 1.9885680  | 0.5439540  |
| H  | -7.4398580 | 2.0318790  | 0.9633730  |
| C  | -5.4834170 | 2.7239060  | 1.5135020  |
| H  | -4.4490720 | 2.7062970  | 1.1573110  |
| H  | -5.4927370 | 2.2897200  | 2.5170670  |
| H  | -5.7723700 | 3.7760440  | 1.6128580  |
| C  | -6.4489750 | 2.6918100  | -0.8241870 |
| H  | -6.7025710 | 3.7518970  | -0.7136850 |
| H  | -7.1830840 | 2.2535380  | -1.5062630 |
| H  | -5.4707750 | 2.6426190  | -1.3131560 |
| C  | -7.1811490 | -0.6751450 | -0.8725970 |
| H  | -6.9955610 | -0.1122960 | -1.7989000 |
| C  | -8.6651990 | -0.4754570 | -0.5146030 |
| H  | -9.3106740 | -0.8465360 | -1.3183790 |
| H  | -8.9200690 | 0.5753510  | -0.3520960 |
| H  | -8.9369730 | -1.0245410 | 0.3915640  |
| C  | -6.8859830 | -2.1549620 | -1.1731940 |

|    |            |            |            |
|----|------------|------------|------------|
| H  | -7.1428930 | -2.7949680 | -0.3257000 |
| H  | -5.8337870 | -2.3310480 | -1.4097890 |
| H  | -7.4797180 | -2.5008040 | -2.0267520 |
| S  | 2.8369220  | -0.0587510 | -0.6384550 |
| C  | 4.2670030  | -0.0005680 | 0.3554360  |
| C  | 3.9262380  | 0.0857220  | 1.6892360  |
| H  | 4.6473350  | 0.1370260  | 2.4949580  |
| C  | 2.5354460  | 0.1066360  | 1.9147610  |
| C  | 1.7690010  | 0.0352360  | 0.7528830  |
| C  | 0.3308700  | 0.0411850  | 0.6818740  |
| O  | -0.3897710 | 0.1112200  | 1.6971290  |
| Br | 1.8357270  | 0.2287970  | 3.6753770  |
| Si | 5.9999210  | -0.1341160 | -0.3882560 |
| C  | 7.1811490  | 0.6751450  | 0.8725970  |
| H  | 6.9955610  | 0.1122960  | 1.7989000  |
| C  | 6.8859830  | 2.1549620  | 1.1731940  |
| H  | 7.4797180  | 2.5008040  | 2.0267520  |
| H  | 5.8337870  | 2.3310480  | 1.4097890  |
| H  | 7.1428930  | 2.7949680  | 0.3257000  |
| C  | 8.6651990  | 0.4754570  | 0.5146030  |
| H  | 8.9369730  | 1.0245410  | -0.3915640 |
| H  | 8.9200690  | -0.5753510 | 0.3520960  |
| H  | 9.3106740  | 0.8465360  | 1.3183790  |
| C  | 6.4250630  | -1.9885680 | -0.5439540 |
| H  | 7.4398580  | -2.0318790 | -0.9633730 |
| C  | 6.4489750  | -2.6918100 | 0.8241870  |
| H  | 5.4707750  | -2.6426190 | 1.3131560  |
| H  | 7.1830840  | -2.2535380 | 1.5062630  |
| H  | 6.7025710  | -3.7518970 | 0.7136850  |
| C  | 5.4834170  | -2.7239060 | -1.5135020 |
| H  | 5.7723700  | -3.7760440 | -1.6128580 |
| H  | 5.4927370  | -2.2897200 | -2.5170670 |
| H  | 4.4490720  | -2.7062970 | -1.1573110 |
| C  | 5.9278510  | 0.6426300  | -2.1276910 |
| H  | 5.0967400  | 0.1112640  | -2.6147920 |
| C  | 7.1892610  | 0.3722880  | -2.9678720 |

|   |           |            |            |
|---|-----------|------------|------------|
| H | 7.0563670 | 0.7368880  | -3.9923450 |
| H | 7.4318390 | -0.6918910 | -3.0308770 |
| H | 8.0640340 | 0.8856220  | -2.5579330 |
| C | 5.5741780 | 2.1401080  | -2.1409350 |
| H | 6.3999730 | 2.7491140  | -1.7642450 |
| H | 4.6924270 | 2.3666520  | -1.5365240 |
| H | 5.3666180 | 2.4777530  | -3.1621690 |

**1b** TP conformer @T<sub>1</sub>

|           |                |            |            |
|-----------|----------------|------------|------------|
| E(UB3LYP) | -7768.02502842 | a.u.       |            |
| S         | -2.8447000     | 0.0580360  | 0.6364500  |
| C         | -4.2750040     | 0.0011990  | -0.3558660 |
| C         | -3.9342970     | -0.0832110 | -1.6883320 |
| H         | -4.6543360     | -0.1336060 | -2.4949920 |
| C         | -2.5415060     | -0.1040010 | -1.9144580 |
| C         | -1.7766210     | -0.0339540 | -0.7545120 |
| C         | -0.3342610     | -0.0399600 | -0.6775480 |
| O         | 0.3895080      | -0.1093870 | -1.6907950 |
| Br        | -1.8506610     | -0.2241280 | -3.6798720 |
| Si        | -6.0082440     | 0.1342870  | 0.3884010  |
| C         | -5.9353590     | -0.6422770 | 2.1278560  |
| H         | -5.1038320     | -0.1112080 | 2.6145880  |
| C         | -5.5823890     | -2.1399370 | 2.1411770  |
| H         | -5.3740900     | -2.4774470 | 3.1623090  |
| H         | -4.7013440     | -2.3671820 | 1.5359790  |
| H         | -6.4088310     | -2.7486110 | 1.7653980  |
| C         | -7.1962590     | -0.3713310 | 2.9686430  |
| H         | -8.0714750     | -0.8841950 | 2.5590780  |
| H         | -7.4382700     | 0.6929700  | 3.0317590  |
| H         | -7.0630980     | -0.7360030 | 3.9930550  |
| C         | -6.4330330     | 1.9886700  | 0.5437540  |
| H         | -7.4476850     | 2.0322380  | 0.9634700  |
| C         | -5.4910790     | 2.7242340  | 1.5128570  |
| H         | -4.4568720     | 2.7066540  | 1.1562310  |
| H         | -5.4999890     | 2.2902050  | 2.5165020  |
| H         | -5.7800300     | 3.7763720  | 1.6121530  |

|    |            |            |            |
|----|------------|------------|------------|
| C  | -6.4573330 | 2.6916160  | -0.8245410 |
| H  | -6.7105010 | 3.7518140  | -0.7141510 |
| H  | -7.1919270 | 2.2534330  | -1.5061390 |
| H  | -5.4794150 | 2.6419550  | -1.3140150 |
| C  | -7.1893130 | -0.6754090 | -0.8719400 |
| H  | -7.0043550 | -0.1123220 | -1.7982300 |
| C  | -8.6734300 | -0.4768190 | -0.5135820 |
| H  | -9.3188790 | -0.8478960 | -1.3173630 |
| H  | -8.9288970 | 0.5737700  | -0.3505110 |
| H  | -8.9446800 | -1.0264900 | 0.3923950  |
| C  | -6.8932340 | -2.1549690 | -1.1731020 |
| H  | -7.1494950 | -2.7954710 | -0.3257860 |
| H  | -5.8410010 | -2.3302080 | -1.4101420 |
| H  | -7.4869470 | -2.5008880 | -2.0266300 |
| S  | 2.8447000  | -0.0580360 | -0.6364500 |
| C  | 4.2750040  | -0.0011990 | 0.3558660  |
| C  | 3.9342970  | 0.0832110  | 1.6883320  |
| H  | 4.6543360  | 0.1336060  | 2.4949920  |
| C  | 2.5415060  | 0.1040010  | 1.9144580  |
| C  | 1.7766210  | 0.0339540  | 0.7545120  |
| C  | 0.3342610  | 0.0399600  | 0.6775480  |
| O  | -0.3895080 | 0.1093870  | 1.6907950  |
| Br | 1.8506610  | 0.2241280  | 3.6798720  |
| Si | 6.0082440  | -0.1342870 | -0.3884010 |
| C  | 7.1893130  | 0.6754090  | 0.8719400  |
| H  | 7.0043550  | 0.1123220  | 1.7982300  |
| C  | 6.8932340  | 2.1549690  | 1.1731020  |
| H  | 7.4869470  | 2.5008880  | 2.0266300  |
| H  | 5.8410010  | 2.3302080  | 1.4101420  |
| H  | 7.1494950  | 2.7954710  | 0.3257860  |
| C  | 8.6734300  | 0.4768190  | 0.5135820  |
| H  | 8.9446800  | 1.0264900  | -0.3923950 |
| H  | 8.9288970  | -0.5737700 | 0.3505110  |
| H  | 9.3188790  | 0.8478960  | 1.3173630  |
| C  | 6.4330330  | -1.9886700 | -0.5437540 |
| H  | 7.4476850  | -2.0322380 | -0.9634700 |

|   |           |            |            |
|---|-----------|------------|------------|
| C | 6.4573330 | -2.6916160 | 0.8245410  |
| H | 5.4794150 | -2.6419550 | 1.3140150  |
| H | 7.1919270 | -2.2534330 | 1.5061390  |
| H | 6.7105010 | -3.7518140 | 0.7141510  |
| C | 5.4910790 | -2.7242340 | -1.5128570 |
| H | 5.7800300 | -3.7763720 | -1.6121530 |
| H | 5.4999890 | -2.2902050 | -2.5165020 |
| H | 4.4568720 | -2.7066540 | -1.1562310 |
| C | 5.9353590 | 0.6422770  | -2.1278560 |
| H | 5.1038320 | 0.1112080  | -2.6145880 |
| C | 7.1962590 | 0.3713310  | -2.9686430 |
| H | 7.0630980 | 0.7360030  | -3.9930550 |
| H | 7.4382700 | -0.6929700 | -3.0317590 |
| H | 8.0714750 | 0.8841950  | -2.5590780 |
| C | 5.5823890 | 2.1399370  | -2.1411770 |
| H | 6.4088310 | 2.7486110  | -1.7653980 |
| H | 4.7013440 | 2.3671820  | -1.5359790 |
| H | 5.3740900 | 2.4774470  | -3.1623090 |

**2a s-cis @S<sub>0</sub>**

|           |                |            |           |
|-----------|----------------|------------|-----------|
| E(RB3LYP) | -3239.96819212 | a.u.       |           |
| C         | 2.2281710      | 1.0950300  | 0.0000000 |
| C         | 0.9466190      | 1.5745600  | 0.0000000 |
| C         | 0.0000000      | 0.5191580  | 0.0000000 |
| C         | 0.5601560      | -0.7410160 | 0.0000000 |
| S         | 2.3031300      | -0.6265520 | 0.0000000 |
| H         | 0.6819290      | 2.6229180  | 0.0000000 |
| C         | -0.0861650     | -2.0518720 | 0.0000000 |
| O         | 0.5138420      | -3.1053340 | 0.0000000 |
| H         | -1.1922410     | -2.0193090 | 0.0000000 |
| Br        | -1.8709840     | 0.8632930  | 0.0000000 |
| H         | 3.1412550      | 1.6734860  | 0.0000000 |

**2a s-trans @S<sub>0</sub>**

|           |                |           |           |
|-----------|----------------|-----------|-----------|
| E(RB3LYP) | -3239.96310971 | a.u.      |           |
| C         | 2.0011990      | 1.6214110 | 0.0000000 |

|    |            |            |           |
|----|------------|------------|-----------|
| C  | 0.6383140  | 1.7314140  | 0.0000000 |
| C  | 0.0000000  | 0.4642630  | 0.0000000 |
| C  | 0.8754590  | -0.6028170 | 0.0000000 |
| S  | 2.5283740  | -0.0172550 | 0.0000000 |
| H  | 0.1013240  | 2.6701400  | 0.0000000 |
| C  | 0.6318670  | -2.0494880 | 0.0000000 |
| O  | -0.4573580 | -2.5733170 | 0.0000000 |
| H  | 1.5580280  | -2.6649460 | 0.0000000 |
| Br | -1.8874860 | 0.3270420  | 0.0000000 |
| H  | 2.7265160  | 2.4222470  | 0.0000000 |

**2a s-cis @T<sub>1</sub>**

|           |                |            |           |
|-----------|----------------|------------|-----------|
| E(UB3LYP) | -3239.87130595 | a.u.       |           |
| C         | 2.2707620      | 1.0208590  | 0.0000000 |
| C         | 0.9779540      | 1.5600900  | 0.0000000 |
| C         | 0.0000000      | 0.6013000  | 0.0000000 |
| C         | 0.5304260      | -0.7974550 | 0.0000000 |
| S         | 2.2950590      | -0.7728750 | 0.0000000 |
| H         | 0.7802760      | 2.6242720  | 0.0000000 |
| C         | -0.1610830     | -2.0280610 | 0.0000000 |
| O         | 0.4357890      | -3.1241470 | 0.0000000 |
| H         | -1.2614670     | -1.9791130 | 0.0000000 |
| Br        | -1.8467690     | 0.9430530  | 0.0000000 |
| H         | 3.2024850      | 1.5667760  | 0.0000000 |

**2a s-trans @T<sub>1</sub>**

|           |                |            |            |
|-----------|----------------|------------|------------|
| E(UB3LYP) | -3239.86584717 | a.u.       |            |
| C         | 2.0107570      | -1.5956050 | 0.1698430  |
| C         | 0.6329930      | -1.6993230 | 0.2724440  |
| C         | -0.0289670     | -0.4958110 | 0.1169030  |
| C         | 0.9047540      | 0.6726840  | -0.0252410 |
| S         | 2.5556400      | 0.0790390  | -0.2126800 |
| H         | 0.1237630      | -2.6405360 | 0.4354560  |
| C         | 0.6224910      | 2.0591360  | 0.0782220  |
| O         | -0.5143280     | 2.5253220  | 0.2474930  |
| H         | 1.4978740      | 2.7296430  | -0.0178550 |



|    |            |            |            |
|----|------------|------------|------------|
| Br | -1.8856090 | -0.3665590 | -0.0850940 |
| H  | 2.7469080  | -2.3732270 | 0.3106000  |

**2b s-cis @T<sub>1</sub>**

E(UB3LYP) -3884.55328910 a.u.

|    |            |            |            |
|----|------------|------------|------------|
| C  | 0.0816690  | 0.1408480  | -0.0040660 |
| C  | -0.9340640 | -0.8449380 | 0.0485640  |
| C  | -2.2072610 | -0.3567900 | -0.0100170 |
| C  | -2.2850060 | 1.1266490  | -0.1139120 |
| S  | -0.6592400 | 1.7948250  | -0.1387170 |
| H  | -0.7133860 | -1.9022530 | 0.1250510  |
| C  | -3.4162560 | 1.9707830  | -0.1852180 |
| O  | -3.3193970 | 3.2109900  | -0.2714530 |
| H  | -4.4022710 | 1.4789910  | -0.1617960 |
| Br | -3.7641150 | -1.4173640 | 0.0278900  |
| Si | 1.9450380  | -0.0924180 | 0.0972610  |
| C  | 2.7170330  | 1.1963140  | -1.0764500 |
| H  | 2.3581650  | 2.1560370  | -0.6767120 |
| C  | 2.4985960  | 0.2728370  | 1.8906000  |
| H  | 3.5786510  | 0.0700660  | 1.9101880  |
| C  | 2.2760730  | -1.9316350 | -0.2896730 |
| H  | 1.6118290  | -2.4695200 | 0.4025230  |
| C  | 4.2545380  | 1.2232100  | -1.0133260 |
| H  | 4.6510110  | 2.0597870  | -1.5988710 |
| H  | 4.6317410  | 1.3335040  | 0.0073060  |
| H  | 4.6892240  | 0.3093650  | -1.4290600 |
| C  | 2.2262260  | 1.1053770  | -2.5320040 |
| H  | 1.1355810  | 1.0946520  | -2.6025900 |
| H  | 2.5823810  | 1.9641280  | -3.1112920 |
| H  | 2.5994250  | 0.2065930  | -3.0288210 |
| C  | 1.8208130  | -0.6720620 | 2.8980480  |
| H  | 2.0178800  | -1.7260670 | 2.6824450  |
| H  | 2.1773790  | -0.4777410 | 3.9154570  |
| H  | 0.7350340  | -0.5328430 | 2.9035640  |
| C  | 2.2893250  | 1.7418570  | 2.2967490  |
| H  | 2.8177030  | 2.4369310  | 1.6387920  |

|   |           |            |            |
|---|-----------|------------|------------|
| H | 1.2306190 | 2.0167930  | 2.2857850  |
| H | 2.6570260 | 1.9171670  | 3.3138280  |
| C | 3.7147520 | -2.3701360 | 0.0406770  |
| H | 3.9912560 | -2.1542010 | 1.0758240  |
| H | 3.8329920 | -3.4489340 | -0.1090010 |
| H | 4.4459650 | -1.8761760 | -0.6054190 |
| C | 1.8937670 | -2.3577470 | -1.7181320 |
| H | 1.9319120 | -3.4478910 | -1.8200970 |
| H | 0.8879870 | -2.0347790 | -1.9999680 |
| H | 2.5871750 | -1.9445480 | -2.4548830 |

**3a @T<sub>1</sub>**

|           |                |            |            |
|-----------|----------------|------------|------------|
| E(UB3LYP) | -1331.58223165 | a.u.       |            |
| C         | 0.0274000      | 4.4106700  | -0.0559520 |
| C         | 1.2557540      | 3.8506880  | -0.2928250 |
| C         | 1.2313820      | 2.4361060  | -0.2852540 |
| C         | -0.0274000     | 1.9263510  | -0.0135570 |
| S         | -1.1997630     | 3.2185330  | 0.1874940  |
| H         | -0.2265700     | 5.4598930  | -0.0093130 |
| H         | 2.1515430      | 4.4324500  | -0.4702230 |
| H         | 2.0918320      | 1.8118850  | -0.4709190 |
| C         | -0.5014010     | 0.5600230  | 0.0814130  |
| O         | -1.7199860     | 0.3002800  | 0.1684500  |
| C         | 0.5014010      | -0.5600230 | 0.0814130  |
| O         | 1.7199860      | -0.3002800 | 0.1684500  |
| C         | 0.0274000      | -1.9263510 | -0.0135570 |
| C         | -1.2313820     | -2.4361060 | -0.2852540 |
| S         | 1.1997630      | -3.2185330 | 0.1874940  |
| C         | -1.2557540     | -3.8506880 | -0.2928250 |
| H         | -2.0918320     | -1.8118850 | -0.4709190 |
| C         | -0.0274000     | -4.4106700 | -0.0559520 |
| H         | -2.1515430     | -4.4324500 | -0.4702230 |
| H         | 0.2265700      | -5.4598930 | -0.0093130 |

**3b @T<sub>1</sub>**

|           |                |      |  |
|-----------|----------------|------|--|
| E(UB3LYP) | -2620.93887232 | a.u. |  |
|-----------|----------------|------|--|

|    |            |            |            |
|----|------------|------------|------------|
| O  | -0.4059800 | -1.6687980 | -0.3461300 |
| C  | -0.5888980 | -0.4547680 | -0.1137910 |
| C  | -1.9224480 | 0.0856120  | 0.0556830  |
| C  | -2.3530610 | 1.3316130  | 0.4845980  |
| H  | -1.6772020 | 2.1250910  | 0.7650490  |
| C  | -3.7603270 | 1.4375070  | 0.5058740  |
| H  | -4.2695080 | 2.3497370  | 0.7941010  |
| C  | -4.4372440 | 0.2912750  | 0.1284820  |
| S  | -3.2926240 | -0.9601040 | -0.2675450 |
| Si | -6.3027530 | 0.0030450  | 0.0952650  |
| C  | -7.1072340 | 1.7171200  | -0.1367880 |
| H  | -6.7145500 | 2.3022260  | 0.7074900  |
| C  | -6.8172330 | -0.7021800 | 1.7941520  |
| H  | -7.9057180 | -0.8453520 | 1.7462210  |
| C  | -6.6516120 | -1.3007050 | -1.2523780 |
| H  | -5.9868650 | -2.1351050 | -0.9834980 |
| C  | -8.6394650 | 1.6880740  | 0.0099510  |
| H  | -9.1106260 | 1.1368740  | -0.8090250 |
| H  | -8.9631860 | 1.2262050  | 0.9467660  |
| H  | -9.0503110 | 2.7035990  | -0.0111660 |
| C  | -6.6963720 | 2.4502010  | -1.4258380 |
| H  | -7.0456930 | 3.4887120  | -1.4071200 |
| H  | -5.6130480 | 2.4681720  | -1.5676590 |
| H  | -7.1352680 | 1.9822610  | -2.3103700 |
| C  | -6.5193660 | 0.2801670  | 2.9399360  |
| H  | -5.4486720 | 0.4979120  | 3.0071620  |
| H  | -7.0443260 | 1.2321830  | 2.8203900  |
| H  | -6.8262680 | -0.1397410 | 3.9043180  |
| C  | -6.1743590 | -2.0713680 | 2.0754020  |
| H  | -6.5111230 | -2.4688420 | 3.0393510  |
| H  | -6.4238360 | -2.8154070 | 1.3137910  |
| H  | -5.0834860 | -1.9989140 | 2.1199950  |
| C  | -8.0919220 | -1.8429280 | -1.2192530 |
| H  | -8.2120850 | -2.6660030 | -1.9323460 |
| H  | -8.3748780 | -2.2229770 | -0.2339750 |
| H  | -8.8184940 | -1.0732980 | -1.4958330 |

|    |            |            |            |
|----|------------|------------|------------|
| C  | -6.2678210 | -0.8599150 | -2.6758470 |
| H  | -6.9534970 | -0.0986360 | -3.0566910 |
| H  | -5.2560940 | -0.4501620 | -2.7278140 |
| H  | -6.3144220 | -1.7078440 | -3.3680580 |
| O  | 0.4050460  | 1.7074300  | 0.0276170  |
| C  | 0.5886590  | 0.4721490  | -0.0146860 |
| C  | 1.9230390  | -0.0912160 | 0.0212590  |
| C  | 2.3555940  | -1.4000420 | 0.1694660  |
| H  | 1.6809780  | -2.2354870 | 0.2788570  |
| C  | 3.7629280  | -1.5064060 | 0.1630910  |
| H  | 4.2736600  | -2.4580680 | 0.2522970  |
| C  | 4.4381750  | -0.3048010 | 0.0415520  |
| S  | 3.2917500  | 1.0011210  | -0.0723000 |
| Si | 6.3014130  | -0.0265570 | -0.0820560 |
| C  | 6.4536540  | -1.3670040 | -2.6101920 |
| H  | 6.7381320  | -1.3484360 | -3.6681250 |
| H  | 6.9841300  | -2.2042930 | -2.1477640 |
| H  | 5.3824950  | -1.5881860 | -2.5664420 |
| C  | 6.7736790  | -0.0234210 | -1.9326020 |
| H  | 7.8624860  | 0.1212520  | -1.9671090 |
| C  | 6.6669280  | 1.6925070  | 0.6585760  |
| H  | 5.9949560  | 2.3613480  | 0.1003250  |
| C  | 8.1044710  | 2.1771980  | 0.3981020  |
| H  | 8.8376460  | 1.5712240  | 0.9384270  |
| H  | 8.3716970  | 2.1486890  | -0.6616730 |
| H  | 8.2322250  | 3.2108100  | 0.7382820  |
| C  | 6.3055130  | 1.8323930  | 2.1477050  |
| H  | 6.3599370  | 2.8808120  | 2.4611180  |
| H  | 5.2956490  | 1.4770520  | 2.3672080  |
| H  | 6.9984150  | 1.2731800  | 2.7816430  |
| C  | 6.1204240  | 1.1385800  | -2.7008090 |
| H  | 5.0291420  | 1.0605080  | -2.6917400 |
| H  | 6.3841080  | 2.1153950  | -2.2858090 |
| H  | 6.4352740  | 1.1367140  | -3.7502870 |
| C  | 7.1264090  | -1.5229330 | 0.7667020  |
| H  | 6.7148310  | -2.3861000 | 0.2237310  |

|   |           |            |            |
|---|-----------|------------|------------|
| C | 6.7586610 | -1.7027200 | 2.2500060  |
| H | 7.2187980 | -0.9318740 | 2.8730330  |
| H | 5.6800010 | -1.6610530 | 2.4199130  |
| H | 7.1160230 | -2.6696160 | 2.6219230  |
| C | 8.6535430 | -1.5578350 | 0.5750910  |
| H | 9.0726900 | -2.4895210 | 0.9711190  |
| H | 8.9462540 | -1.4911570 | -0.4762970 |
| H | 9.1439710 | -0.7369490 | 1.1063320  |
